# Supplementary material
Source: PubMed Central journal article supplement (PMC4504185)
Supplement: ct5b00356_si_001.pdf [file ct5b00356_si_001.pdf]

# Improved Peptide and Protein Torsional Energetics with the OPLS-AA Force Field

## Supplementary Information

Michael J. Robertson, Julian Tirado-Rives, and William L. Jorgensen\*

Department of Chemistry, Yale University, New Haven, Connecticut 06520-8107, United States

**Figure S1.** Two-dimensional Phi-Psi Potential Energy Surfaces.....pp 3-4

**Table S1.** Summary of the Force Field Parameters Developed and Tested in this  
Work for the Alanine and Glycine Peptide Backbone.....pp 4

**Table S2.** Summary of the  $\chi_1$  Force Field Parameters Developed  
and Tested in this Work.....pp 5-8

**Table S3.** Summary of the  $\chi_2$  Force Field Parameters Developed  
and Tested in this Work.....pp 9-10

**Table S4.** Summary of the Results of the Molecular Dynamics  
Simulations of Blocked Dipeptides Performed in this Work.....pp 10-12

**Table S5.** Relative Conformer Energies for the Blocked Alanine Dipeptide  
Calculated with Various *Ab Initio* Methods and Molecular Mechanics Force Fields.....pp 13

|                                                                                                                                                                                            |          |
|--------------------------------------------------------------------------------------------------------------------------------------------------------------------------------------------|----------|
| <b>Table S6.</b> Relative Conformer Energies for the Blocked Alanine Tetrapeptide<br>Calculated with Various <i>ab initio</i> and DFT Methods.....                                         | pp 14    |
| <b>Table S7.</b> Values of $\phi$ and $\psi$ for the Alanine Tetrapeptides<br>Calculated at the $\omega$ B97X-D/6-311++g(p,d) Level of Theory.....                                         | pp 15    |
| <b>Table S8.</b> Values of $\phi$ and $\psi$ for the Alanine Tetrapeptides<br>Calculated at the M06-2X/6-31+g(d) Level of Theory.....                                                      | pp 16    |
| <b>Table S9.</b> Relative Conformer Energies for the Blocked Proline Dipeptide<br>Calculated with Various <i>ab initio</i> Methods and Molecular Mechanics Force Fields.....               | pp 17    |
| <b>Table S10.</b> Summary of the Force Field Parameters Developed and Tested<br>in this Work for Proline .....                                                                             | pp 17    |
| <b>Figure SI2.</b> The Populations of Each Rotamer as a Percentage from<br>Molecular Dynamics Simulations of Blocked Dipeptides Versus the Average<br>Populations from a Coil Library..... | pp 18-19 |
| <b>Figure SI3.</b> The RMSD Between the Coordinates of the Backbone<br>Atoms in the MD Simulations Compared to the Starting Experimental Structure.....                                    | pp 19-20 |

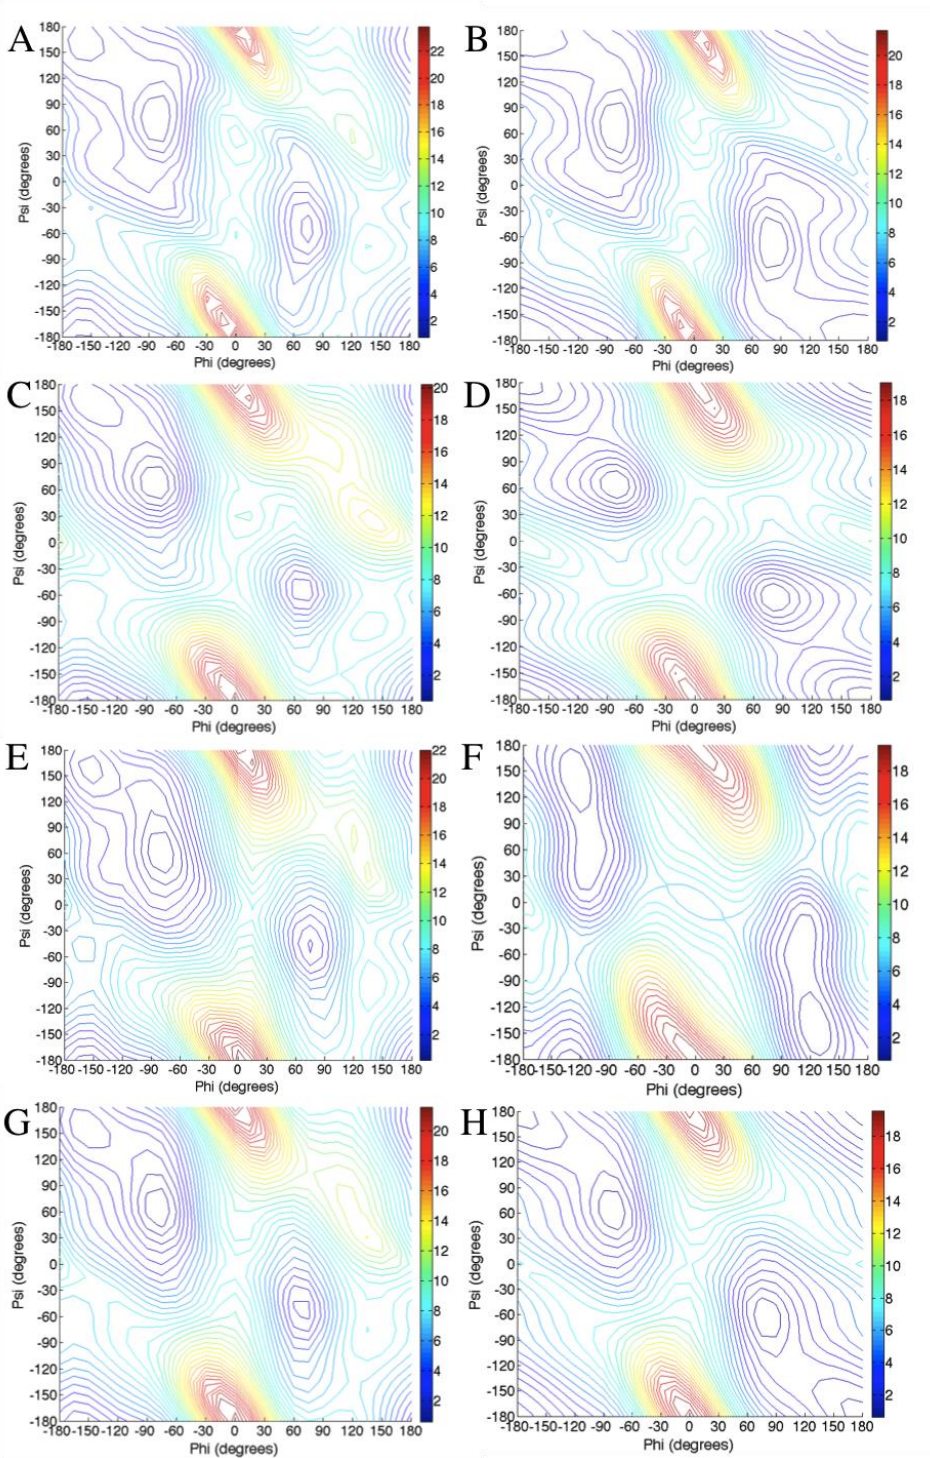

**Figure S1.** Two dimensional phi-psi potential energy surfaces calculated for A) alanine at the B2PLYP-D3BJ/aug-cc-pVTZ// $\omega$ B97X-D/6-311++G(d,p) level of theory, B) glycine at the B2PLYP-D3BJ/aug-cc-pVTZ// $\omega$ B97X-D/6-311++G(d,p) level of theory, C) alanine with the

original OPLS-AA forcefield, D) glycine with the original OPLS-AA forcefield, E) alanine with the OPLS-AA/L force field, F) glycine with the OPLS-AA/L force field, G) alanine with the newly derived 2000 K parameters, and H) glycine with the newly derived 2000 K parameters. The energies are given in kcal/mol.

**Table S1. Summary of the Force Field Parameters Developed and Tested in this Work for the Alanine and Glycine Peptide Backbone and their Boltzmann-Weighted Errors Compared to the B2PLYP-D3BJ/aug-cc-pVTZ// $\omega$ B97X-D/6-311++G(d,p) Relative Energies. Parameters Noted with a \* are those Selected for the OPLS-AA/M Force Field.**

|                             |         | Parameters <sup>a</sup> |        |        | Boltzmann Weighted Error <sup>a</sup> |        |        |        |            |
|-----------------------------|---------|-------------------------|--------|--------|---------------------------------------|--------|--------|--------|------------|
|                             |         | V1                      | V2     | V3     |                                       | 500 K  | 1000 K | 2000 K | Unweighted |
| OPLS-AA                     | $\phi$  | -2.365                  | 0.912  | -0.850 | Alanine                               | 0.1055 | 0.2779 | 0.5283 | 1.2606     |
|                             | $\psi$  | 1.816                   | 1.222  | 1.581  | Glycine                               | 0.2765 | 0.5689 | 0.8932 | 1.6028     |
|                             | $\phi'$ | 0.000                   | 0.462  | 0.000  |                                       |        |        |        |            |
|                             | $\psi'$ | 1.173                   | 0.189  | -1.200 |                                       |        |        |        |            |
| OPLS-AA/L                   | $\phi$  | -0.596                  | 0.279  | -4.913 | Alanine                               | 0.1073 | 0.2646 | 0.5317 | 1.3811     |
|                             | $\psi$  | 0.743                   | 2.508  | -0.805 | Glycine                               | 0.6807 | 1.1942 | 1.7343 | 3.0049     |
|                             | $\phi'$ | 0.519                   | 0.877  | 5.223  |                                       |        |        |        |            |
|                             | $\psi'$ | 1.865                   | 0.089  | 0.351  |                                       |        |        |        |            |
| <u>Optimized Parameters</u> |         |                         |        |        |                                       |        |        |        |            |
| 500 K                       | $\phi$  | -2.196                  | 0.286  | -0.493 | Alanine                               | 0.0814 | 0.2074 | 0.4089 | 1.0437     |
|                             | $\psi$  | 1.508                   | 1.592  | -0.44  | Glycine                               | 0.1503 | 0.3357 | 0.5548 | 1.0913     |
|                             | $\phi'$ | -1.2                    | 0.733  | 0.26   |                                       |        |        |        |            |
|                             | $\psi'$ | 1.19                    | 0.508  | -0.012 |                                       |        |        |        |            |
| 1000 K                      | $\phi$  | -2.417                  | 0.266  | -0.383 | Alanine                               | 0.0866 | 0.1995 | 0.3761 | 0.9518     |
|                             | $\psi$  | 1.55                    | 1.96   | -0.5   | Glycine                               | 0.1423 | 0.3023 | 0.3848 | 1.0007     |
|                             | $\phi'$ | -0.73                   | 0.318  | 0.439  |                                       |        |        |        |            |
|                             | $\psi'$ | 1.502                   | 0.47   | -0.023 |                                       |        |        |        |            |
| *2000 K                     | $\phi$  | -2.511                  | 0.21   | -0.2   | Alanine                               | 0.0934 | 0.2037 | 0.3719 | 0.9271     |
|                             | $\psi$  | 1.81                    | 2.155  | -0.47  | Glycine                               | 0.1497 | 0.2975 | 0.4766 | 0.9558     |
|                             | $\phi'$ | -0.682                  | 0.13   | 0.338  |                                       |        |        |        |            |
|                             | $\psi'$ | 1.779                   | 0.419  | -0.11  |                                       |        |        |        |            |
| Unweighted                  | $\phi$  | -2.271                  | 0.072  | 0.017  | Alanine                               | 0.1053 | 0.2169 | 0.3792 | 0.9128     |
|                             | $\psi$  | 2.016                   | 2.217  | -0.517 | Glycine                               | 0.1658 | 0.3124 | 0.3870 | 0.9544     |
|                             | $\phi'$ | -0.632                  | -0.053 | 0.055  |                                       |        |        |        |            |
|                             | $\psi'$ | 1.946                   | 0.255  | -0.146 |                                       |        |        |        |            |

<sup>a</sup>Both the parameters and the RMSD values have units of kcal/mol

**Table S2. Summary of the  $\chi_1$  Force Field Parameters Developed and Tested in this Work and their Boltzmann-Weighted Errors Compared to the B2PLYP-D3BJ/aug-cc-pVTZ// $\omega$ B97X-D/6-311++G(d,p) Relative Energies. Parameters Noted with a \* are those Selected for the OPLS-AA/M Force Field.**

|                       |           | Parameters <sup>a</sup> |        |       | Average Boltzmann Weighted Error Per Scan <sup>a</sup> |        |        |            |
|-----------------------|-----------|-------------------------|--------|-------|--------------------------------------------------------|--------|--------|------------|
|                       |           | V1                      | V2     | V3    | 500 K                                                  | 1000 K | 2000 K | Unweighted |
| <u>Valine</u>         |           |                         |        |       |                                                        |        |        |            |
| OPLS-AA               | $\chi_1$  | 0.845                   | -0.962 | 0.713 | 0.761                                                  | 1.011  | 1.293  | 1.846      |
|                       | $\chi_1'$ | -1.697                  | -0.456 | 0.585 |                                                        |        |        |            |
| OPLS-AA/L             | $\chi_1$  | 0.946                   | 0.383  | 0.440 | 0.370                                                  | 0.474  | 0.575  | 0.751      |
|                       | $\chi_1'$ | -1.294                  | 0.748  | 0.000 |                                                        |        |        |            |
| 2000 K Val            | $\chi_1$  | 2.804                   | 0.081  | 0.511 | 0.139                                                  | 0.221  | 0.315  | 0.496      |
|                       | $\chi_1'$ | -1.823                  | 0.797  | 0.000 |                                                        |        |        |            |
| *2000 K Val/Ile       | $\chi_1$  | 2.994                   | 0.252  | 0.300 | 0.169                                                  | 0.260  | 0.360  | 0.553      |
|                       | $\chi_1'$ | -1.422                  | 1.068  | 0.000 |                                                        |        |        |            |
| 2000 K Val/Ile/Leu    | $\chi_1$  | 2.561                   | 0.283  | 0.277 | 0.185                                                  | 0.277  | 0.377  | 0.574      |
|                       | $\chi_1'$ | -1.407                  | 1.279  | 0.000 |                                                        |        |        |            |
| <u>Isoleucine</u>     |           |                         |        |       |                                                        |        |        |            |
| OPLS-AA               | $\chi_1$  | 0.845                   | -0.962 | 0.713 | 0.660                                                  | 1.003  | 1.363  | 2.022      |
|                       | $\chi_1'$ | -1.697                  | -0.456 | 0.585 |                                                        |        |        |            |
| OPLS-AA/L             | $\chi_1$  | 2.647                   | 0.954  | 0.522 | 0.264                                                  | 0.473  | 0.703  | 1.145      |
|                       | $\chi_1'$ | 0.678                   | 1.276  | 0.000 |                                                        |        |        |            |
| 2000 K Ile            | $\chi_1$  | 3.746                   | 0.483  | 0.185 | 0.169                                                  | 0.344  | 0.552  | 1.001      |
|                       | $\chi_1'$ | -0.756                  | 1.241  | 0.000 |                                                        |        |        |            |
| *2000 K Val/Ile       | $\chi_1$  | 2.994                   | 0.252  | 0.300 | 0.191                                                  | 0.382  | 0.602  | 1.066      |
|                       | $\chi_1'$ | -1.422                  | 1.068  | 0.000 |                                                        |        |        |            |
| 2000 K Val/Ile/Leu    | $\chi_1$  | 2.561                   | 0.283  | 0.277 | 0.197                                                  | 0.388  | 0.609  | 1.085      |
|                       | $\chi_1'$ | -1.407                  | 1.279  | 0.000 |                                                        |        |        |            |
| <u>Leucine</u>        |           |                         |        |       |                                                        |        |        |            |
| OPLS-AA               | $\chi_1$  | 0.845                   | -0.962 | 0.713 | 0.318                                                  | 0.560  | 0.859  | 1.498      |
|                       | $\chi_1'$ | -1.697                  | -0.456 | 0.585 |                                                        |        |        |            |
| OPLS-AA/L             | $\chi_1$  | 0.110                   | 0.263  | 0.594 | 0.324                                                  | 0.560  | 0.847  | 1.490      |
|                       | $\chi_1'$ | -0.539                  | 0.073  | 0.000 |                                                        |        |        |            |
| *2000 K Leu           | $\chi_1$  | 1.572                   | 0.159  | 0.200 | 0.263                                                  | 0.457  | 0.695  | 1.238      |
|                       | $\chi_1'$ | -1.751                  | 1.606  | 0.000 |                                                        |        |        |            |
| 2000 K Val/Ile/Leu    | $\chi_1$  | 2.561                   | 0.283  | 0.277 | 0.281                                                  | 0.483  | 0.741  | 1.313      |
|                       | $\chi_1'$ | -1.407                  | 1.279  | 0.000 |                                                        |        |        |            |
| <u>Serine</u>         |           |                         |        |       |                                                        |        |        |            |
| OPLS-AA               | $\chi_1$  | 6.280                   | -1.467 | 2.030 | 0.404                                                  | 0.645  | 0.977  | 1.717      |
|                       | $\chi_1'$ | -6.180                  | 0.000  | 0.000 |                                                        |        |        |            |
| OPLS-AA/L             | $\chi_1$  | 5.429                   | -0.879 | 1.058 | 0.418                                                  | 0.643  | 0.935  | 1.577      |
|                       | $\chi_1'$ | -5.654                  | -0.872 | 0.000 |                                                        |        |        |            |
| 2000 K Ser            | $\chi_1$  | 5.835                   | -0.607 | 0.705 | 0.309                                                  | 0.475  | 0.692  | 1.169      |
|                       | $\chi_1'$ | -5.006                  | 0.809  | 0.000 |                                                        |        |        |            |
| *2000 K Ser Empirical | $\chi_1$  | 6.258                   | -1.037 | 1.367 | 0.359                                                  | 0.556  | 0.815  | 1.388      |
|                       | $\chi_1'$ | -5.793                  | 0.405  | 0.000 |                                                        |        |        |            |

<sup>a</sup>Both the parameters and the error values have units of kcal/mol

**Table S2 Continued**

|                               |                    | Parameters <sup>a</sup> |        |        | Average Boltzmann Weighted Error Per Scan <sup>a</sup> |        |        |            |
|-------------------------------|--------------------|-------------------------|--------|--------|--------------------------------------------------------|--------|--------|------------|
|                               |                    | V1                      | V2     | V3     | 500 K                                                  | 1000 K | 2000 K | Unweighted |
| <u>Threonine</u>              |                    |                         |        |        |                                                        |        |        |            |
| OPLS-AA                       | $\chi_1^C$         | 0.845                   | -0.962 | 0.713  | 0.598                                                  | 0.981  | 1.486  | 2.582      |
|                               | $\chi_1^{C\gamma}$ | -1.697                  | -0.456 | 0.585  |                                                        |        |        |            |
|                               | $\chi_1^O$         | 6.280                   | -1.467 | 2.030  |                                                        |        |        |            |
|                               | $\chi_1^{O\gamma}$ | -6.180                  | 0.000  | 0.000  |                                                        |        |        |            |
| OPLS-AA/L                     | $\chi_1^C$         | 0.845                   | -0.962 | 0.713  | 0.444                                                  | 0.700  | 1.029  | 1.783      |
|                               | $\chi_1^{C\gamma}$ | -1.697                  | -0.456 | 0.585  |                                                        |        |        |            |
|                               | $\chi_1^O$         | 5.429                   | -0.879 | 1.058  |                                                        |        |        |            |
|                               | $\chi_1^{O\gamma}$ | -5.654                  | -0.872 | 0.000  |                                                        |        |        |            |
| 2000 K Val/Ile/Leu $\chi_1^C$ | $\chi_1^C$         | 2.561                   | 0.283  | 0.957  | 0.314                                                  | 0.491  | 0.725  | 1.269      |
| Ser $\chi_1^O$                | $\chi_1^{C\gamma}$ | -1.407                  | 1.279  | -0.680 |                                                        |        |        |            |
|                               | $\chi_1^O$         | 5.835                   | -0.607 | 0.705  |                                                        |        |        |            |
|                               | $\chi_1^{O\gamma}$ | -5.006                  | 0.809  | 0.000  |                                                        |        |        |            |
| *2000 K Val/Ile $\chi_1^C$    | $\chi_1^C$         | 2.994                   | 0.252  | 0.300  | 0.346                                                  | 0.554  | 0.827  | 1.455      |
| Ser Empirical $\chi_1^O$      | $\chi_1^{C\gamma}$ | -1.422                  | 1.068  | 0.000  |                                                        |        |        |            |
|                               | $\chi_1^O$         | 6.258                   | -1.037 | 1.367  |                                                        |        |        |            |
|                               | $\chi_1^{O\gamma}$ | -5.793                  | 0.405  | 0.000  |                                                        |        |        |            |
| <u>Aspartate</u>              |                    |                         |        |        |                                                        |        |        |            |
| OPLS-AA                       | $\chi_1$           | 0.845                   | -0.962 | 0.713  | 0.367                                                  | 0.949  | 2.017  | 5.626      |
|                               | $\chi_1^\gamma$    | -1.697                  | -0.456 | 0.585  |                                                        |        |        |            |
| OPLS-AA/L                     | $\chi_1$           | -9.457                  | -0.154 | -0.253 | 0.201                                                  | 0.446  | 0.914  | 2.757      |
|                               | $\chi_1^\gamma$    | -4.774                  | 3.031  | 0.000  |                                                        |        |        |            |
| 2000 K Asp/Asn                | $\chi_1$           | -5.885                  | 1.243  | 0.000  | 0.143                                                  | 0.321  | 0.645  | 1.881      |
|                               | $\chi_1^\gamma$    | 0.897                   | 2.069  | 0.433  |                                                        |        |        |            |
| 2000 K Asp                    | $\chi_1$           | -8.290                  | 0.662  | 0.997  | 0.107                                                  | 0.216  | 0.442  | 1.463      |
|                               | $\chi_1^\gamma$    | 1.543                   | 3.096  | 0.000  |                                                        |        |        |            |
| *2000 K Asp Empirical         | $\chi_1$           | -7.890                  | 0.662  | 0.997  | 0.191                                                  | 0.354  | 0.638  | 1.807      |
|                               | $\chi_1^\gamma$    | 1.543                   | 0.696  | 0.000  |                                                        |        |        |            |
| <u>Asparagine</u>             |                    |                         |        |        |                                                        |        |        |            |
| OPLS-AA                       | $\chi_1$           | 0.845                   | -0.962 | 0.713  | 0.825                                                  | 1.342  | 2.111  | 4.076      |
|                               | $\chi_1^\gamma$    | -1.697                  | -0.456 | 0.585  |                                                        |        |        |            |
| OPLS-AA/L                     | $\chi_1$           | -3.467                  | -0.677 | 1.465  | 0.387                                                  | 0.685  | 1.116  | 2.207      |
|                               | $\chi_1^\gamma$    | 1.045                   | -1.603 | 0.000  |                                                        |        |        |            |
| 2000 K Asp/Asn                | $\chi_1$           | -5.885                  | 1.243  | 0.000  | 0.280                                                  | 0.442  | 0.671  | 1.246      |
|                               | $\chi_1^\gamma$    | 0.897                   | 2.069  | 0.433  |                                                        |        |        |            |
| *2000 K Asn                   | $\chi_1$           | -5.501                  | 1.527  | 0.000  | 0.250                                                  | 0.403  | 0.613  | 1.127      |
|                               | $\chi_1^\gamma$    | 0.598                   | 1.558  | 0.255  |                                                        |        |        |            |
| <u>Glutamine</u>              |                    |                         |        |        |                                                        |        |        |            |
| OPLS-AA                       | $\chi_1$           | 0.845                   | -0.962 | 0.713  | 0.259                                                  | 0.461  | 0.722  | 1.368      |
|                               | $\chi_1^\gamma$    | -1.697                  | -0.456 | 0.585  |                                                        |        |        |            |
| OPLS-AA/L                     | $\chi_1$           | 1.167                   | -0.526 | 0.805  | 0.230                                                  | 0.411  | 0.646  | 1.219      |
|                               | $\chi_1^\gamma$    | -2.692                  | 0.836  | 0.000  |                                                        |        |        |            |
| 2000 K Leu                    | $\chi_1$           | 1.572                   | 0.159  | 0.200  | 0.233                                                  | 0.414  | 0.648  | 1.220      |
|                               | $\chi_1^\gamma$    | -1.751                  | 1.606  | 0.000  |                                                        |        |        |            |
| 2000 K Gln                    | $\chi_1$           | 1.240                   | 0.838  | 0.983  | 0.163                                                  | 0.279  | 0.441  | 0.872      |
|                               | $\chi_1^\gamma$    | -2.096                  | 0.821  | 0.000  |                                                        |        |        |            |
| *2000 K Gln/Lys               | $\chi_1$           | 0.884                   | 0.897  | 0.880  | 0.162                                                  | 0.283  | 0.454  | 0.910      |
|                               | $\chi_1^\gamma$    | -2.358                  | 0.911  | 0.000  |                                                        |        |        |            |

<sup>a</sup>Both the parameters and the error values have units of kcal/mol

**Table S2 Continued**

|                       |           | Parameters <sup>a</sup> |        |        | Average Boltzmann Weighted Error Per Scan <sup>a</sup> |        |        |            |
|-----------------------|-----------|-------------------------|--------|--------|--------------------------------------------------------|--------|--------|------------|
|                       |           | V1                      | V2     | V3     | 500 K                                                  | 1000 K | 2000 K | Unweighted |
| <u>Lysine</u>         |           |                         |        |        |                                                        |        |        |            |
| OPLS-AA               | $\chi_1$  | 0.845                   | -0.962 | 0.713  | 0.320                                                  | 0.500  | 0.741  | 1.347      |
|                       | $\chi_1'$ | -1.697                  | -0.456 | 0.585  |                                                        |        |        |            |
| OPLS-AA/L             | $\chi_1$  | 0.639                   | -0.214 | 0.399  | 0.296                                                  | 0.461  | 0.684  | 1.310      |
|                       | $\chi_1'$ | -2.235                  | -0.536 | 0.00   |                                                        |        |        |            |
| 2000 K Leu            | $\chi_1$  | 1.572                   | 0.159  | 0.200  | 0.239                                                  | 0.410  | 0.648  | 1.283      |
|                       | $\chi_1'$ | -1.751                  | 1.606  | 0.000  |                                                        |        |        |            |
| 2000 K Lys            | $\chi_1$  | 0.357                   | 0.932  | 0.750  | 0.147                                                  | 0.272  | 0.465  | 1.014      |
|                       | $\chi_1'$ | -2.745                  | 1.015  | 0.000  |                                                        |        |        |            |
| *2000 K Gln/Lys       | $\chi_1$  | 0.884                   | 0.897  | 0.880  | 0.155                                                  | 0.286  | 0.482  | 1.024      |
|                       | $\chi_1'$ | -2.358                  | 0.911  | 0.000  |                                                        |        |        |            |
| <u>Glutamate</u>      |           |                         |        |        |                                                        |        |        |            |
| OPLS-AA               | $\chi_1$  | 0.845                   | -0.962 | 0.713  | 0.387                                                  | 0.650  | 1.052  | 2.691      |
|                       | $\chi_1'$ | -1.697                  | -0.456 | 0.585  |                                                        |        |        |            |
| OPLS-AA/L             | $\chi_1$  | 4.952                   | -0.257 | -0.235 | 0.369                                                  | 0.585  | 0.987  | 2.629      |
|                       | $\chi_1'$ | -1.618                  | -0.571 | 0.000  |                                                        |        |        |            |
| 2000 K Leu            | $\chi_1$  | 1.572                   | 0.159  | 0.200  | 0.328                                                  | 0.558  | 0.917  | 2.444      |
|                       | $\chi_1'$ | -1.751                  | 1.606  | 0.000  |                                                        |        |        |            |
| 2000 K Glu            | $\chi_1$  | 3.287                   | 0.457  | 0.820  | 0.213                                                  | 0.341  | 0.621  | 1.970      |
|                       | $\chi_1'$ | -1.764                  | 1.100  | 0.000  |                                                        |        |        |            |
| *2000 K Glu Empirical | $\chi_1$  | 1.987                   | 0.457  | 0.820  | 0.280                                                  | 0.440  | 0.734  | 2.132      |
|                       | $\chi_1'$ | -1.764                  | 0.700  | 0.000  |                                                        |        |        |            |
| <u>Cysteine</u>       |           |                         |        |        |                                                        |        |        |            |
| OPLS-AA               | $\chi_1$  | 1.428                   | 0.086  | 0.029  | 0.534                                                  | 0.852  | 1.199  | 1.845      |
|                       | $\chi_1'$ | -4.344                  | -1.714 | 0.000  |                                                        |        |        |            |
| OPLS-AA/L             | $\chi_1$  | 1.428                   | 0.086  | 0.029  | 0.544                                                  | 0.872  | 1.225  | 1.876      |
|                       | $\chi_1'$ | -4.344                  | -1.714 | 0.000  |                                                        |        |        |            |
| 2000 K Cys            | $\chi_1$  | 2.355                   | 0.529  | 0.544  | 0.199                                                  | 0.375  | 0.572  | 0.940      |
|                       | $\chi_1'$ | -3.323                  | 1.469  | 0.000  |                                                        |        |        |            |
| *2000 K Cys Empirical | $\chi_1$  | 2.055                   | 0.529  | 0.544  | 0.246                                                  | 0.435  | 0.652  | 1.062      |
|                       | $\chi_1'$ | -3.323                  | 0.529  | 0.000  |                                                        |        |        |            |
| <u>Methionine</u>     |           |                         |        |        |                                                        |        |        |            |
| OPLS-AA               | $\chi_1$  | 0.845                   | -0.962 | 0.713  | 0.354                                                  | 0.547  | 0.764  | 1.185      |
|                       | $\chi_1'$ | -1.697                  | -0.456 | 0.585  |                                                        |        |        |            |
| OPLS-AA/L             | $\chi_1$  | 1.493                   | 0.199  | -0.098 | 0.377                                                  | 0.554  | 0.728  | 1.045      |
|                       | $\chi_1'$ | 0.384                   | -0.762 | 0.000  |                                                        |        |        |            |
| 2000 K Leu            | $\chi_1$  | 1.572                   | 0.159  | 0.200  | 0.293                                                  | 0.476  | 0.677  | 1.084      |
|                       | $\chi_1'$ | -1.751                  | 1.606  | 0.000  |                                                        |        |        |            |
| *2000 K Met           | $\chi_1$  | 0.214                   | 0.541  | 0.392  | 0.185                                                  | 0.276  | 0.369  | 0.553      |
|                       | $\chi_1'$ | -0.911                  | 0.699  | 0.000  |                                                        |        |        |            |
| <u>Arginine</u>       |           |                         |        |        |                                                        |        |        |            |
| OPLS-AA               | $\chi_1$  | 0.845                   | -0.962 | 0.713  | 0.298                                                  | 0.464  | 0.639  | 0.975      |
|                       | $\chi_1'$ | -1.697                  | -0.456 | 0.585  |                                                        |        |        |            |
| OPLS-AA/L             | $\chi_1$  | 1.821                   | 0.951  | 1.168  | 0.298                                                  | 0.506  | 0.728  | 1.166      |
|                       | $\chi_1'$ | -0.678                  | 1.653  | 0.000  |                                                        |        |        |            |
| 2000 K Leu            | $\chi_1$  | 1.572                   | 0.159  | 0.200  | 0.223                                                  | 0.385  | 0.565  | 0.941      |
|                       | $\chi_1'$ | -1.751                  | 1.606  | 0.000  |                                                        |        |        |            |
| *2000 K Arg           | $\chi_1$  | 0.103                   | 0.653  | 0.563  | 0.146                                                  | 0.245  | 0.365  | 0.662      |
|                       | $\chi_1'$ | -1.971                  | 0.770  | 0.000  |                                                        |        |        |            |
| <u>Phenylalanine</u>  |           |                         |        |        |                                                        |        |        |            |
| OPLS-AA               | $\chi_1$  | 0.845                   | -0.962 | 0.713  | 0.412                                                  | 0.682  | 0.996  | 1.641      |
|                       | $\chi_1'$ | -1.697                  | -0.456 | 0.585  |                                                        |        |        |            |
| OPLS-AA/L             | $\chi_1$  | 0.845                   | -0.962 | 0.713  | 0.394                                                  | 0.673  | 0.994  | 1.645      |
|                       | $\chi_1'$ | -1.697                  | -0.456 | 0.585  |                                                        |        |        |            |
| *2000 K Phe           | $\chi_1$  | 1.712                   | 0.725  | 0.366  | 0.201                                                  | 0.377  | 0.577  | 0.990      |
|                       | $\chi_1'$ | -1.406                  | 1.777  | 0.000  |                                                        |        |        |            |

<sup>a</sup>Both the parameters and the error values have units of kcal/mol

**Table S2 Continued**

|                                        |           | Parameters <sup>a</sup> |        |        | Average Boltzmann Weighted Error Per Scan <sup>a</sup> |        |        |            |
|----------------------------------------|-----------|-------------------------|--------|--------|--------------------------------------------------------|--------|--------|------------|
|                                        |           | V1                      | V2     | V3     | 500 K                                                  | 1000 K | 2000 K | Unweighted |
| <u>Tyrosine</u>                        |           |                         |        |        |                                                        |        |        |            |
| OPLS-AA                                | $\chi_1$  | 0.845                   | -0.962 | 0.713  | 0.405                                                  | 0.686  | 1.007  | 1.663      |
|                                        | $\chi_1'$ | -1.697                  | -0.456 | 0.585  |                                                        |        |        |            |
| OPLS-AA/L                              | $\chi_1$  | 0.845                   | -0.962 | 0.713  | 0.390                                                  | 0.682  | 1.014  | 1.676      |
|                                        | $\chi_1'$ | -1.697                  | -0.456 | 0.585  |                                                        |        |        |            |
| 2000 K Tyr                             | $\chi_1$  | 1.611                   | 0.653  | 0.535  | 0.200                                                  | 0.379  | 0.584  | 1.011      |
|                                        | $\chi_1'$ | -1.491                  | 1.792  | 0.000  |                                                        |        |        |            |
| *2000 K Phe                            | $\chi_1$  | 1.712                   | 0.725  | 0.366  | 0.202                                                  | 0.382  | 0.587  | 1.014      |
|                                        | $\chi_1'$ | -1.406                  | 1.777  | 0.000  |                                                        |        |        |            |
| <u>Tryptophan</u>                      |           |                         |        |        |                                                        |        |        |            |
| OPLS-AA                                | $\chi_1$  | 0.845                   | -0.962 | 0.713  | 0.410                                                  | 0.683  | 0.980  | 1.548      |
|                                        | $\chi_1'$ | -1.697                  | -0.456 | 0.585  |                                                        |        |        |            |
| OPLS-AA/L                              | $\chi_1$  | -1.294                  | 0.562  | 0.094  | 0.369                                                  | 0.618  | 0.911  | 1.541      |
|                                        | $\chi_1'$ | -1.058                  | -0.625 | 0.000  |                                                        |        |        |            |
| 2000 K Phe                             | $\chi_1$  | 1.712                   | 0.725  | 0.366  | 0.226                                                  | 0.446  | 0.723  | 1.330      |
|                                        | $\chi_1'$ | -1.406                  | 1.777  | 0.000  |                                                        |        |        |            |
| 2000 K Trp                             | $\chi_1$  | 0.068                   | 1.020  | 0.665  | 0.221                                                  | 0.361  | 0.529  | 0.893      |
|                                        | $\chi_1'$ | -0.506                  | 1.375  | 0.000  |                                                        |        |        |            |
| *2000 K Trp Empirical                  | $\chi_1$  | -0.588                  | 1.020  | 0.665  | 0.260                                                  | 0.413  | 0.593  | 0.970      |
|                                        | $\chi_1'$ | -0.506                  | 0.975  | 0.000  |                                                        |        |        |            |
| <u>Histidine-<math>\epsilon</math></u> |           |                         |        |        |                                                        |        |        |            |
| OPLS-AA                                | $\chi_1$  | 0.845                   | -0.962 | 0.713  | 0.323                                                  | 0.651  | 1.053  | 1.883      |
|                                        | $\chi_1'$ | -1.697                  | -0.456 | 0.585  |                                                        |        |        |            |
| OPLS-AA/L                              | $\chi_1$  | -0.713                  | 0.502  | 0.289  | 0.304                                                  | 0.584  | 0.921  | 1.633      |
|                                        | $\chi_1'$ | -1.607                  | 0.046  | 0.000  |                                                        |        |        |            |
| 2000 K Hie                             | $\chi_1$  | -0.437                  | 0.538  | 0.000  | 0.255                                                  | 0.419  | 0.631  | 1.105      |
|                                        | $\chi_1'$ | -1.416                  | 2.050  | -0.082 |                                                        |        |        |            |
| *2000 K Hie/Hid                        | $\chi_1$  | -0.542                  | 0.435  | 0.000  | 0.251                                                  | 0.421  | 0.637  | 1.113      |
|                                        | $\chi_1'$ | -1.282                  | 1.645  | -0.017 |                                                        |        |        |            |
| <u>Histidine-<math>\delta</math></u>   |           |                         |        |        |                                                        |        |        |            |
| OPLS-AA                                | $\chi_1$  | 0.845                   | -0.962 | 0.713  | 0.428                                                  | 0.724  | 1.084  | 1.809      |
|                                        | $\chi_1'$ | -1.697                  | -0.456 | 0.585  |                                                        |        |        |            |
| OPLS-AA/L                              | $\chi_1$  | -0.713                  | 0.502  | 0.289  | 0.333                                                  | 0.560  | 0.827  | 1.364      |
|                                        | $\chi_1'$ | -1.607                  | 0.046  | 0.000  |                                                        |        |        |            |
| 2000 K Hid                             | $\chi_1$  | -0.614                  | 0.455  | 0.013  | 0.247                                                  | 0.439  | 0.670  | 1.155      |
|                                        | $\chi_1'$ | -1.055                  | 1.204  | 0.000  |                                                        |        |        |            |
| *2000 K Hie/Hid                        | $\chi_1$  | -0.542                  | 0.435  | 0.000  | 0.250                                                  | 0.445  | 0.679  | 1.177      |
|                                        | $\chi_1'$ | -1.282                  | 1.645  | -0.017 |                                                        |        |        |            |
| <u>Protonated His</u>                  |           |                         |        |        |                                                        |        |        |            |
| OPLS-AA                                | $\chi_1$  | 0.845                   | -0.962 | 0.713  | 0.514                                                  | 0.806  | 1.233  | 2.654      |
|                                        | $\chi_1'$ | -1.697                  | -0.456 | 0.585  |                                                        |        |        |            |
| OPLS-AA/L                              | $\chi_1$  | 0.347                   | -0.350 | 1.468  | 0.514                                                  | 0.799  | 1.171  | 2.253      |
|                                        | $\chi_1'$ | 1.679                   | 0.082  | 0.000  |                                                        |        |        |            |
| 2000 K Hid/Hie                         | $\chi_1$  | -0.542                  | 0.435  | 0.000  | 0.310                                                  | 0.538  | 0.898  | 2.047      |
|                                        | $\chi_1'$ | -1.282                  | 1.645  | -0.017 |                                                        |        |        |            |
| *2000 K Hip                            | $\chi_1$  | -3.038                  | 0.419  | 0.000  | 0.243                                                  | 0.449  | 0.761  | 1.747      |
|                                        | $\chi_1'$ | -1.708                  | 1.516  | -0.502 |                                                        |        |        |            |

<sup>a</sup>Both the parameters and the error values have units of kcal/mol



**Table S3. Summary of the  $\chi_2$  Force Field Parameters Developed and Tested in this Work and their Boltzmann-Weighted Errors Compared to the  $\omega$ B97X-D/6-311++G(d,p) and, where Applicable, B2PLYP-D3BJ/aug-cc-pVTZ// $\omega$ B97X-D/6-311++G(d,p) Relative Energies. Parameters Noted with a \* are those Selected for the OPLS-AA/M Force Field.**

|                                        |             | Parameters <sup>a</sup> |        |        | Average Boltzmann Weighted Error Per Scan <sup>a</sup> |        |        |            |
|----------------------------------------|-------------|-------------------------|--------|--------|--------------------------------------------------------|--------|--------|------------|
|                                        |             | V1                      | V2     | V3     | 500 K                                                  | 1000 K | 2000 K | Unweighted |
| <u>Isoleucine</u>                      |             |                         |        |        |                                                        |        |        |            |
| *OPLS-AA                               | $\chi_2$    | 1.300                   | -0.200 | 0.200  | 0.196                                                  | 0.295  | 0.407  | 0.661      |
| 2000 K Ile                             | $\chi_2$    | 0.595                   | -0.240 | 0.295  | 0.157                                                  | 0.253  | 0.366  | 0.629      |
| <u>Leucine</u>                         |             |                         |        |        |                                                        |        |        |            |
| *OPLS-AA                               | $\chi_2$    | 1.300                   | -0.200 | 0.200  | 0.166                                                  | 0.283  | 0.424  | 0.733      |
| 2000 K Ile                             | $\chi_2$    | 0.295                   | -0.005 | 0.300  | 0.160                                                  | 0.265  | 0.387  | 0.640      |
| <u>Serine</u>                          |             |                         |        |        |                                                        |        |        |            |
| *OPLS-AA                               | $\chi_2$    | -0.356                  | -0.174 | 0.492  | 0.355                                                  | 0.530  | 0.687  | 0.929      |
| OPLS-AA/L                              | $\chi_2$    | -0.991                  | -0.869 | 0.739  | 0.359                                                  | 0.534  | 0.685  | 0.912      |
| 2000 K Ser                             | $\chi_2$    | -0.366                  | -0.849 | 0.542  | 0.315                                                  | 0.486  | 0.639  | 0.875      |
| <u>Cysteine</u>                        |             |                         |        |        |                                                        |        |        |            |
| *OPLS-AA                               | $\chi_2$    | -0.759                  | -0.282 | 0.680  | 0.249                                                  | 0.426  | 0.581  | 0.813      |
| 2000 K Cys                             | $\chi_2$    | -0.754                  | -1.502 | 0.745  | 0.231                                                  | 0.368  | 0.485  | 0.659      |
| <u>Methionine</u>                      |             |                         |        |        |                                                        |        |        |            |
| OPLS-AA                                | $\chi_2$    | 2.619                   | -0.620 | 0.258  | 0.318                                                  | 0.481  | 1.166  | 2.665      |
| *2000 K Met                            | $\chi_2$    | -1.565                  | -0.009 | -0.450 | 0.160                                                  | 0.285  | 0.463  | 1.196      |
| <u>Asparagine</u>                      |             |                         |        |        |                                                        |        |        |            |
| OPLS-AA                                | $\chi_2$ N  | 2.844                   | -0.361 | -0.325 | 0.226                                                  | 0.465  | 0.838  | 1.737      |
|                                        | $\chi_2$ 'O | 0.406                   | 1.304  | 0.139  |                                                        |        |        |            |
| OPLS-AA/L                              | $\chi_2$ N  | -0.546                  | -2.127 | -0.832 | 0.354                                                  | 0.537  | 0.779  | 1.333      |
|                                        | $\chi_2$ 'O | 0.000                   | 1.166  | 0.000  |                                                        |        |        |            |
| *2000 K Asn                            | $\chi_2$ N  | 1.494                   | -0.511 | 0.125  | 0.159                                                  | 0.263  | 0.413  | 0.759      |
|                                        | $\chi_2$ 'O | 1.656                   | 1.304  | 0.439  |                                                        |        |        |            |
| <u>Aspartate</u>                       |             |                         |        |        |                                                        |        |        |            |
| OPLS-AA                                | $\chi_2$    | 0.000                   | 0.546  | 0.000  | 0.239                                                  | 0.382  | 0.547  | 0.878      |
| *2000 K Asp                            | $\chi_2$    | 0.000                   | 1.000  | 1.350  | 0.187                                                  | 0.298  | 0.433  | 0.710      |
| <u>Glutamine</u>                       |             |                         |        |        |                                                        |        |        |            |
| OPLS-AA                                | $\chi_2$    | -1.567                  | -0.979 | 0.636  | 0.181                                                  | 0.362  | 0.615  | 1.476      |
| 2000 K Gln                             | $\chi_2$    | -0.867                  | -0.829 | 0.036  | 0.143                                                  | 0.279  | 0.484  | 1.295      |
| *2000 K Gln Emp.                       | $\chi_2$    | -1.267                  | 0.479  | -0.486 | 0.172                                                  | 0.349  | 0.489  | 1.384      |
| <u>Glutamate</u>                       |             |                         |        |        |                                                        |        |        |            |
| OPLS-AA                                | $\chi_2$    | -3.185                  | -0.825 | 0.493  | 0.195                                                  | 0.445  | 0.888  | 2.506      |
| 2000 K Glu                             | $\chi_2$    | -6.745                  | -0.759 | -0.647 | 0.143                                                  | 0.346  | 0.766  | 2.493      |
| *2000 K Glu Emp.                       | $\chi_2$    | -0.885                  | 1.025  | -1.293 | 0.281                                                  | 0.554  | 1.062  | 2.819      |
| <u>Phenylalanine</u>                   |             |                         |        |        |                                                        |        |        |            |
| *OPLS-AA                               | $\chi_2$    | 0.000                   | 0.000  | 0.000  | 0.128                                                  | 0.243  | 0.373  | 0.616      |
| 2000 K Phe                             | $\chi_2$    | -2.955                  | 0.095  | 1.015  | 0.126                                                  | 0.232  | 0.354  | 0.584      |
| <u>Tyrosine</u>                        |             |                         |        |        |                                                        |        |        |            |
| *OPLS-AA                               | $\chi_2$    | 0.000                   | 0.000  | 0.000  | 0.157                                                  | 0.270  | 0.405  | 0.662      |
| 2000 K Tyr                             | $\chi_2$    | -3.040                  | 0.150  | 0.125  | 0.158                                                  | 0.261  | 0.386  | 0.630      |
| <u>Tryptophan</u>                      |             |                         |        |        |                                                        |        |        |            |
| *OPLS-AA                               | $\chi_2$    | -0.714                  | 0.000  | 0.000  | 0.274                                                  | 0.455  | 0.684  | 1.295      |
| 2000 K Trp                             | $\chi_2$    | -1.714                  | -0.800 | -0.900 | 0.260                                                  | 0.417  | 0.608  | 1.104      |
| <u>Histidine-<math>\epsilon</math></u> |             |                         |        |        |                                                        |        |        |            |
| OPLS-AA                                | $\chi_2$    | 2.366                   | -0.262 | 0.505  | 0.363                                                  | 0.538  | 0.729  | 1.109      |
| OPLS-AA/L                              | $\chi_2$    | -0.543                  | 0.014  | 0.700  | 0.235                                                  | 0.354  | 0.491  | 0.778      |
| 2000 K Hie                             | $\chi_2$    | -0.790                  | -0.335 | 0.140  | 0.164                                                  | 0.244  | 0.344  | 0.576      |
| *2000 K Hie/Hid                        | $\chi_2$    | -0.560                  | -0.740 | 0.349  | 0.181                                                  | 0.265  | 0.364  | 0.581      |

<sup>a</sup>Both the parameters and the Error values have units of kcal/mol

**Table S3 Continued**

|                                      |          | Parameters <sup>a</sup> |        |       | Average Boltzmann Weighted Error Per Scan <sup>a</sup> |        |        |            |
|--------------------------------------|----------|-------------------------|--------|-------|--------------------------------------------------------|--------|--------|------------|
|                                      |          | V1                      | V2     | V3    | 500 K                                                  | 1000 K | 2000 K | Unweighted |
| <u>Histidine-<math>\delta</math></u> |          |                         |        |       |                                                        |        |        |            |
| OPLS-AA                              | $\chi_2$ | 2.366                   | -0.262 | 0.505 | 0.187                                                  | 0.390  | 0.646  | 1.152      |
| OPLS-AA/L                            | $\chi_2$ | -0.543                  | 0.014  | 0.700 | 0.202                                                  | 0.353  | 0.526  | 0.850      |
| 2000 K Hid                           | $\chi_2$ | -0.585                  | -1.100 | 0.375 | 0.125                                                  | 0.211  | 0.314  | 0.522      |
| *2000 K Hie/Hid                      | $\chi_2$ | -0.560                  | -0.740 | 0.349 | 0.132                                                  | 0.222  | 0.326  | 0.531      |
| <u>Protonated His</u>                |          |                         |        |       |                                                        |        |        |            |
| OPLS-AA                              | $\chi_2$ | 2.366                   | -0.262 | 0.505 | 0.610                                                  | 1.030  | 1.792  | 3.976      |
| OPLS-AA/L                            | $\chi_2$ | -0.543                  | 0.014  | 0.700 | 0.392                                                  | 0.693  | 1.227  | 2.740      |
| *2000 K Hip                          | $\chi_2$ | -3.990                  | 1.680  | 0.290 | 0.265                                                  | 0.444  | 0.713  | 1.395      |
| 2000 K Hie/Hid                       | $\chi_2$ | -0.560                  | -0.740 | 0.349 | 0.431                                                  | 0.750  | 1.310  | 2.887      |

<sup>a</sup>Both the parameters and the Error values have units of kcal/mol

**Table S4. Summary of the Results of the Molecular Dynamics Simulations of Blocked Dipeptides Performed in this Work with all Force Fields.**

| Valine                                                                | Experiment (NMR) <sup>a</sup> | Coil Library <sup>b</sup> | OPLS-AA     | OPLS-AA/L   | 2000K Val/Ile/Leu | 2000K Val/Ile         |
|-----------------------------------------------------------------------|-------------------------------|---------------------------|-------------|-------------|-------------------|-----------------------|
| <sup>3</sup> J(H <sub>N</sub> H <sub><math>\alpha</math></sub> ) (Hz) | 7.30                          |                           | 8.15 ± 0.02 | 8.01 ± 0.01 | 7.40 ± 0.01       | 7.39 ± 0.01           |
| %m                                                                    | 8.1 ± 2.5                     | 9.3                       | 74.0 ± 5.2  | 62.2 ± 3.0  | 6.0 ± 0.6         | 8.1 ± 1.2             |
| %p                                                                    | 39.2 ± 5.7                    | 33.3                      | 13.1 ± 2.9  | 9.9 ± 1.9   | 18.4 ± 2.6        | 13.6 ± 0.9            |
| %t                                                                    | 52.8 ± 6.8                    | 57.4                      | 13.0 ± 2.4  | 27.9 ± 1.2  | 75.6 ± 2.6        | 78.3 ± 0.3            |
| Isoleucine                                                            | Experiment (NMR) <sup>a</sup> | Coil Library <sup>b</sup> | OPLS-AA     | OPLS-AA/L   | 2000K Val/Ile/Leu | 2000K Val/Ile         |
| <sup>3</sup> J(H <sub>N</sub> H <sub><math>\alpha</math></sub> ) (Hz) | 7.33                          |                           | 8.19 ± 0.06 | 7.81 ± 0.00 | 7.42 ± 0.00       | 7.40 ± 2.3            |
| %m                                                                    | 63.1 ± 6.7                    | 61.2                      | 3.7 ± 1.8   | 71.3 ± 1.6  | 57.8 ± 7.2        | 55.6 ± 6.3            |
| %p                                                                    | 28.3 ± 6.0                    | 26.7                      | 85.0 ± 12.9 | 23.0 ± 0.1  | 24.2 ± 3.5        | 19.2 ± 10.2           |
| %t                                                                    | 8.6 ± 4.4                     | 12.1                      | 11.3 ± 11.3 | 5.7 ± 1.6   | 18.1 ± 2.0        | 25.2 ± 4.1            |
| Leucine                                                               | Experiment (NMR) <sup>a</sup> | Coil Library <sup>b</sup> | OPLS-AA     | OPLS-AA/L   | 2000K Val/Ile/Leu | 2000 K Leu            |
| <sup>3</sup> J(H <sub>N</sub> H <sub><math>\alpha</math></sub> ) (Hz) | 6.88                          |                           | 8.04 ± 0.01 | 7.72 ± 0.02 | 7.28 ± 0.00       | 7.40 ± 0.01           |
| %m                                                                    | 73.6 ± 6.0                    | 73.1                      | 55.9 ± 4.7  | 81.3 ± 1.0  | 36.7 ± 1.4        | 66.1 ± 1.7            |
| %p                                                                    | 7.0 ± 6.8                     | 1.8                       | 10.1 ± 6.3  | 5.3 ± 1.2   | 0.8 ± 0.1         | 1.6 ± 0.1             |
| %t                                                                    | 19.6 ± 4.6                    | 25.1                      | 34.0 ± 2.3  | 13.4 ± 0.7  | 62.5 ± 1.5        | 32.3 ± 1.8            |
| Serine                                                                | Experiment (NMR) <sup>a</sup> | Coil Library <sup>b</sup> | OPLS-AA     | OPLS-AA/L   | 2000 K Ser        | 2000 K Ser Reweighted |
| <sup>3</sup> J(H <sub>N</sub> H <sub><math>\alpha</math></sub> ) (Hz) | 7.02                          |                           | 7.87 ± 0.00 | 7.87 ± 0.04 | 7.10 ± 0.01       | 7.21 ± 0.01           |
| %m                                                                    | 33.1 ± 0.7                    | 29.4                      | 13.9 ± 2.9  | 10.3 ± 0.4  | 66.8 ± 2.3        | 40.0 ± 2.9            |
| %p                                                                    | 29.4 ± 0.3                    | 53.4                      | 63.0 ± 6.5  | 75.6 ± 1.1  | 17.7 ± 1.9        | 28.6 ± 4.4            |
| %t                                                                    | 37.5 ± 1.0                    | 17.2                      | 23.1 ± 3.6  | 14.1 ± 0.9  | 15.5 ± 0.9        | 31.4 ± 3.7            |
| Threonine                                                             | Experiment (NMR) <sup>a</sup> | Coil Library <sup>b</sup> | OPLS-AA     | OPLS-AA/L   | 2000 K Ser        | 2000 K Ser Reweighted |
| <sup>3</sup> J(H <sub>N</sub> H <sub><math>\alpha</math></sub> ) (Hz) | 7.35                          |                           | 8.01 ± 0.01 | 8.02 ± 0.08 | 7.13 ± 0.03       | 7.22 ± 0.04           |
| %m                                                                    | 39.3 ± 7.3                    | 27.3                      | 6.1 ± 4.6   | 1.1 ± 0.1   | 64.2 ± 8.2        | 46.9 ± 11.6           |
| %p                                                                    | 46.6 ± 5.1                    | 63.7                      | 92.3 ± 6.6  | 54.5 ± 33.3 | 34.2 ± 8.4        | 51.1 ± 11.6           |
| %t                                                                    | 14.1 ± 7.1                    | 9.0                       | 1.7 ± 2.4   | 44.3 ± 33.9 | 1.6 ± 0.6         | 2.0 ± 0.4             |

<sup>a</sup>J couplings for dipeptides given in reference 48. Rotamer populations and errors given are the averages and standard deviations over all residues in denatured ubiquitin and protein G from reference reference 42 <sup>b</sup>Coil library data from reference 43

**Table S4 Continued**

|                                                     | Experiment<br>(NMR) <sup>a</sup> | Coil<br>Library <sup>b</sup> | OPLS-AA     | OPLS-AA/L   | 2000 K Cys  | 2000 K Cys<br>Reweighted |
|-----------------------------------------------------|----------------------------------|------------------------------|-------------|-------------|-------------|--------------------------|
| <b>Cysteine</b>                                     |                                  |                              |             |             |             |                          |
| <sup>3</sup> J(H <sub>N</sub> H <sub>α</sub> ) (Hz) | 7.31                             |                              | 7.89 ± 0.01 | 8.01 ± 0.03 | 7.23 ± 0.00 | 7.25 ± 0.01              |
| %m                                                  |                                  | 45.8                         | 3.7 ± 0.3   | 2.9 ± 0.4   | 78.2 ± 1.6  | 57.8 ± 0.9               |
| %p                                                  |                                  | 29.2                         | 63.3 ± 4.9  | 74.3 ± 2.6  | 6.7 ± 0.7   | 13.8 ± 1.6               |
| %t                                                  |                                  | 25.0                         | 33.0 ± 4.5  | 22.9 ± 2.3  | 15.1 ± 2.1  | 28.4 ± 0.0               |
| <b>Methionine</b>                                   |                                  |                              |             |             |             |                          |
| <sup>3</sup> J(H <sub>N</sub> H <sub>α</sub> ) (Hz) | 7.02                             |                              | 7.97 ± 0.01 | 7.66 ± 0.01 | 7.45 ± 0.02 |                          |
| %m                                                  |                                  | 61.3                         | 21.1 ± 1.4  | 21.2 ± 0.4  | 52.9 ± 0.9  |                          |
| %p                                                  |                                  | 13.9                         | 33.7 ± 7.2  | 8.6 ± 1.4   | 8.2 ± 0.2   |                          |
| %t                                                  |                                  | 24.8                         | 45.2 ± 5.86 | 70.2 ± 1.3  | 38.9 ± 1.0  |                          |
| <b>Asparagine</b>                                   |                                  |                              |             |             |             |                          |
| <sup>3</sup> J(H <sub>N</sub> H <sub>α</sub> ) (Hz) | 7.45                             |                              | 7.88 ± 0.00 | 7.84 ± 0.17 | 7.39 ± 0.00 |                          |
| %m                                                  | 46.1 ± 3.2                       | 55.1                         | 0.0 ± 0.0   | 5.0 ± 2.8   | 60.9 ± 2.9  |                          |
| %p                                                  | 27.1 ± 3.4                       | 18.9                         | 0.0 ± 0.0   | 53.9 ± 25.5 | 9.1 ± 1.8   |                          |
| %t                                                  | 26.5 ± 4.4                       | 26.0                         | 100.0 ± 0.0 | 41.0 ± 22.7 | 30.0 ± 1.4  |                          |
| <b>Aspartate</b>                                    |                                  |                              |             |             |             |                          |
| <sup>3</sup> J(H <sub>N</sub> H <sub>α</sub> ) (Hz) | 6.93                             |                              | 7.75 ± 0.01 | 7.80 ± 0.00 | 6.85 ± 0.01 | 2000K<br>Asp/Asn         |
| %m                                                  | 44.9 ± 5.5                       | 48.2                         | 0.0 ± 0.0   | 0.2 ± 0.0   | 97.0 ± 1.3  | 7.05 ± 0.00              |
| %p                                                  | 30.3 ± 5.9                       | 22.8                         | 0.0 ± 0.0   | 97.5 ± 0.2  | 2.2 ± 1.1   | 23.9 ± 1.7               |
| %t                                                  | 24.8 ± 4.3                       | 28.9                         | 100.0 ± 0.0 | 2.3 ± 0.2   | 0.8 ± 0.9   | 55.8 ± 5.2               |
|                                                     |                                  |                              |             |             |             | 2000 K Asp<br>Reweighted |
|                                                     |                                  |                              |             |             |             | 7.05 ± 0.00              |
|                                                     |                                  |                              |             |             |             | 23.9 ± 1.7               |
|                                                     |                                  |                              |             |             |             | 55.8 ± 5.2               |
|                                                     |                                  |                              |             |             |             | 25.4 ± 4.6               |
|                                                     |                                  |                              |             |             |             | 18.8 ± 2.7               |
| <b>Glutamine</b>                                    |                                  |                              |             |             |             |                          |
| <sup>3</sup> J(H <sub>N</sub> H <sub>α</sub> ) (Hz) | 7.14                             |                              | 8.27 ± 0.06 | 7.85 ± 0.02 | 7.37 ± 0.02 | 2000K<br>Gln/Lys         |
| %m                                                  | 61.4 ± 3.5                       | 64.0                         | 80.1 ± 6.4  | 63.6 ± 3.2  | 52.3 ± 3.5  |                          |
| %p                                                  | 15.7 ± 2.0                       | 11.4                         | 7.5 ± 5.1   | 14.5 ± 2.8  | 5.4 ± 0.8   |                          |
| %t                                                  | 22.9 ± 3.5                       | 24.6                         | 12.3 ± 2.0  | 21.9 ± 2.1  | 42.3 ± 3.9  |                          |
| <b>Glutamate</b>                                    |                                  |                              |             |             |             |                          |
| <sup>3</sup> J(H <sub>N</sub> H <sub>α</sub> ) (Hz) | 6.63                             |                              | 7.58 ± 0.03 | 7.22 ± 0.10 | 7.08 ± 0.03 | 2000 K Glu<br>Reweighted |
| %m                                                  | 60.8 ± 3.1                       | 60.1                         | 84.1 ± 4.2  | 88.3 ± 5.4  | 42.3 ± 9.9  | 6.97 ± 0.04              |
| %p                                                  | 16.4 ± 2.3                       | 13.9                         | 8.9 ± 2.1   | 6.8 ± 2.2   | 0.00 ± 0.00 | 70.4 ± 5.5               |
| %t                                                  | 22.7 ± 2.6                       | 26.0                         | 6.9 ± 2.2   | 4.9 ± 3.2   | 57.2 ± 10.0 | 4.7 ± 3.6                |
|                                                     |                                  |                              |             |             |             | 24.9 ± 4.6               |
| <b>Lysine</b>                                       |                                  |                              |             |             |             |                          |
| <sup>3</sup> J(H <sub>N</sub> H <sub>α</sub> ) (Hz) | 6.83                             |                              | 8.12 ± 0.01 | 7.90 ± 0.02 | 7.37 ± 0.02 | 2000K<br>Gln/Lys         |
| %m                                                  | 60.7 ± 3.2                       | 64.9                         | 61.8 ± 3.9  | 26.0 ± 1.5  | 43.2 ± 2.7  |                          |
| %p                                                  | 15.3 ± 2.1                       | 10.6                         | 24.7 ± 6.1  | 49.9 ± 2.1  | 10.5 ± 1.9  |                          |
| %t                                                  | 24.0 ± 3.1                       | 24.6                         | 13.4 ± 2.2  | 24.1 ± 0.1  | 46.3 ± 4.3  |                          |
| <b>Arginine</b>                                     |                                  |                              |             |             |             |                          |
| <sup>3</sup> J(H <sub>N</sub> H <sub>α</sub> ) (Hz) | 6.85                             |                              | 8.18 ± 0.02 | 7.82 ± 0.11 | 7.53 ± 0.02 | 2000 K Arg               |
| %m                                                  | 59.5 ± 1.9                       | 60.6                         | 52.4 ± 6.0  | 74.3 ± 0.9  | 56.4 ± 4.0  |                          |
| %p                                                  | 16.1 ± 3.0                       | 16.6                         | 23.7 ± 9.6  | 1.8 ± 0.2   | 15.7 ± 0.7  |                          |
| %t                                                  | 24.4 ± 2.1                       | 22.8                         | 23.9 ± 3.6  | 23.9 ± 1.0  | 27.9 ± 3.7  |                          |

<sup>a</sup>J couplings for dipeptides given in reference 48. Rotamer populations and errors given are the averages and standard deviations over all residues in denatured ubiquitin and protein G from reference reference 42 <sup>b</sup>Coil library data from reference 43

**Table S4 Continued**

|                                                     |                                  |                              |             |             |             |                          |
|-----------------------------------------------------|----------------------------------|------------------------------|-------------|-------------|-------------|--------------------------|
| Phenylalanine                                       | Experiment<br>(NMR) <sup>a</sup> | Coil<br>Library <sup>b</sup> | OPLS-AA     | OPLS-AA/L   | 2000 K Phe  |                          |
| <sup>3</sup> J(H <sub>N</sub> H <sub>α</sub> ) (Hz) | 7.18                             |                              | 8.18 ± 0.01 | 8.01 ± 6.4  | 7.41 ± 0.02 |                          |
| %m                                                  | 60.7 ± 5.3                       | 51.6                         | 36.5 ± 6.0  | 26.7 ± 8.2  | 51.3 1.3    |                          |
| %p                                                  | 12.2 ± 5.0                       | 19.0                         | 33.1 ± 9.0  | 51.9 ± 14.1 | 2.0 0.6     |                          |
| %t                                                  | 27.2 ± 3.6                       | 29.5                         | 30.4 ± 3.1  | 21.4 ± 6.0  | 46.7 1.1    |                          |
| Tyrosine                                            | Experiment<br>(NMR) <sup>a</sup> | Coil<br>Library <sup>b</sup> | OPLS-AA     | OPLS-AA/L   | 2000 K Tyr  |                          |
| <sup>3</sup> J(H <sub>N</sub> H <sub>α</sub> ) (Hz) | 7.13                             |                              | 8.21 ± 0.02 | 8.05 ± 0.05 | 7.46 ± 0.05 |                          |
| %m                                                  | 59.4 ± 7.8                       | 48.4                         | 38.8 ± 3.5  | 31.3 ± 5.3  | 49.7 ± 4.4  |                          |
| %p                                                  | 14.1 ± 2.0                       | 18.8                         | 26.6 ± 9.9  | 42.6 ± 10.5 | 2.1 ± 0.3   |                          |
| %t                                                  | 26.5 ± 6.2                       | 32.8                         | 34.7 ± 6.7  | 26.0 ± 5.2  | 48.2 ± 4.2  |                          |
| Tryptophan                                          | Experiment<br>(NMR) <sup>a</sup> | Coil<br>Library <sup>b</sup> | OPLS-AA     | OPLS-AA/L   | 2000 K Trp  | 2000 K Trp<br>Reweighted |
| <sup>3</sup> J(H <sub>N</sub> H <sub>α</sub> ) (Hz) | 6.91                             |                              | 8.01 ± 0.03 | 7.91 ± 0.05 | 7.46 ± 0.04 | 7.55 ± 2.8               |
| %m                                                  | 52.0                             | 44.7                         | 6.0 ± 2.3   | 11.9 ± 0.3  | 44.7 ± 6.0  | 56.2 ± 2.7               |
| %p                                                  | 14.3                             | 23.3                         | 36.8 ± 0.6  | 47.6 ± 4.9  | 3.5 ± 1.0   | 9.2 ± 0.8                |
| %t                                                  | 33.6                             | 32.0                         | 57.2 ± 4.3  | 40.5 ± 5.1  | 51.8 ± 5.0  | 34.6 ± 1.9               |
| Histidine-δ                                         | Experiment<br>(NMR) <sup>a</sup> | Coil<br>Library <sup>b</sup> | OPLS-AA     | OPLS-AA/L   | 2000 K Hid  |                          |
| <sup>3</sup> J(H <sub>N</sub> H <sub>α</sub> ) (Hz) |                                  |                              | 7.94 ± 0.01 | 7.70 ± 0.06 | 7.40 ± 0.02 |                          |
| %m                                                  |                                  | 55.6                         | 31.7 ± 0.4  | 22.7 ± 1.0  | 67.8 ± 3.7  |                          |
| %p                                                  |                                  | 18.9                         | 9.7 ± 7.2   | 26.6 ± 6.1  | 9.0 ± 0.7   |                          |
| %t                                                  |                                  | 25.5                         | 58.7 ± 7.6  | 50.7 ± 5.2  | 23.1 ± 3.5  |                          |
| Histidine-ε                                         | Experiment<br>(NMR) <sup>a</sup> | Coil<br>Library <sup>b</sup> | OPLS-AA     | OPLS-AA/L   | 2000 K Hie  |                          |
| <sup>3</sup> J(H <sub>N</sub> H <sub>α</sub> ) (Hz) |                                  |                              | 7.88 ± 0.3  | 7.60 ± 0.05 | 7.17 ± 0.01 |                          |
| %m                                                  |                                  | 55.6                         | 25.5 ± 6.9  | 21.4 ± 2.1  | 71.0 ± 1.9  |                          |
| %p                                                  |                                  | 18.9                         | 31.8 ± 8.8  | 40.8 ± 3.4  | 10.7 ± 1.1  |                          |
| %t                                                  |                                  | 25.5                         | 42.7 ± 1.9  | 37.7 ± 1.4  | 18.4 ± 1.0  |                          |
| Histidine<br>Protonated                             | Experiment<br>(NMR) <sup>a</sup> | Coil<br>Library <sup>b</sup> | OPLS-AA     | OPLS-AA/L   | 2000 K Hip  |                          |
| <sup>3</sup> J(H <sub>N</sub> H <sub>α</sub> ) (Hz) | 7.76                             |                              | 7.97 0.01   | 8.05 0.02   | 7.54 0.02   |                          |
| %m                                                  | 60.1                             | 55.6                         | 9.3 0.9     | 71.4 8.8    | 73.0 2.4    |                          |
| %p                                                  | 14.0                             | 18.9                         | 13.2 2.9    | 13.2 10.5   | 16.2 1.7    |                          |
| %t                                                  | 25.9                             | 25.5                         | 77.5 3.8    | 15.3 3.5    | 10.8 0.7    |                          |

<sup>a</sup>J couplings for dipeptides given in reference 48. Rotamer populations and errors given are the averages and standard deviations over all residues in denatured ubiquitin and protein G from reference reference 42 <sup>b</sup>Coil library data from reference 43

**Table S5. Relative Conformer Energies (in kcal/mol) for the Blocked Alanine Dipeptide Calculated with Various *Ab Initio* Methods and Molecular Mechanics Force Fields**

|                      | CCSD(T)/<br>CBS <sup>a</sup> | DF-<br>LCCSD(T0) <sup>b</sup> | OPLS-<br>AA | OPLS-<br>AA/L | 500K | 1000K | 2000K | Unweighted |
|----------------------|------------------------------|-------------------------------|-------------|---------------|------|-------|-------|------------|
| C7-eq                | 0                            | 0                             | 0.00        | 0.00          | 0.00 | 0.00  | 0.00  | 0.00       |
| C5                   | 1.43                         | 1.24                          | 1.37        | 0.98          | 1.54 | 1.43  | 1.21  | 0.81       |
| C7-ax                | 2.45                         | 2.42                          | 2.52        | 2.48          | 2.04 | 2.15  | 2.16  | 2.11       |
| B2 <sup>c</sup>      | 3.31                         | 3                             | 5.39        | 3.33          | 3.85 | 3.65  | 3.55  | 3.28       |
| Alpha L <sup>c</sup> | 4.95                         |                               | 8.26        | 7.26          | 6.29 | 6.01  | 5.85  | 5.81       |
| Alpha Prime          | 6.56                         |                               | 6.56        | 6.19          | 6.64 | 6.90  | 7.04  | 6.95       |
| RMSD Minima          |                              |                               | 0.05        | 0.29          | 0.21 | 0.23  | 0.30  | 0.40       |
| RMSD All             |                              | 0.18                          | 1.60        | 0.97          | 0.61 | 0.49  | 0.45  | 0.48       |

<sup>a</sup>Reference 16 <sup>b</sup>Reference 15 <sup>c</sup>Not true minima with the force fields, phi and psi were fixed at their values from the  $\omega$ B97X-D/6-311++G(d,p) calculations

**Table S6. Relative Conformer Energies (in kcal/mol) for the Blocked Alanine Tetrapeptide  
Calculated with Various *ab initio* and DFT Methods**

| Conformer Number | $\omega$ B97X-D/6-311++g(p,d) Optimized Geometry |                                      |                                    |                                    | M06-2X/6-31+g(d) Optimized Geometry |                           |                           |
|------------------|--------------------------------------------------|--------------------------------------|------------------------------------|------------------------------------|-------------------------------------|---------------------------|---------------------------|
|                  | RI-MP2(CBS)//HF/6-31G** Energy <sup>a</sup>      | $\omega$ B97X-D/6-311++g(p,d) Energy | $\omega$ B97X-D/aug-cc-pVTZ Energy | $\omega$ B97X-D/jun-cc-pVQZ Energy | M06-2X/6-31+g(d) Energy             | M06-2X/aug-cc-pVTZ Energy | M06-2X/jun-cc-pVQZ Energy |
| 1                | 4.13                                             | 6.18                                 | 5.05                               | 4.72                               | 6.94                                | 5.31                      | 4.95                      |
| 2                | 4.19                                             | 5.93                                 | 4.99                               | 4.71                               | 6.64                                | 5.28                      | 4.96                      |
| 3                | 0.57                                             | 0.71                                 | 0.62                               | 0.57                               | 2.52                                | 2.09                      | 1.96                      |
| 4                | 5.73                                             | 7.43                                 | 6.44                               | 6.14                               | 8.37                                | 6.93                      | 6.62                      |
| 5                | 5.26                                             | 6.97                                 | 6.05                               | 5.79                               | 7.96                                | 6.53                      | 6.26                      |
| 6                | 2.90                                             | 3.29                                 | 3.11                               | 3.08                               | 3.23                                | 2.71                      | 2.65                      |
| 7                | 6.67                                             | 7.40                                 | 7.01                               | 6.95                               | 8.24                                | 7.24                      | 7.25                      |
| 8                | 4.64                                             | 5.89                                 | 5.69                               | 5.62                               | 5.61                                | 5.31                      | 5.31                      |
| 9                | 7.92                                             | 8.38                                 | 7.95                               | 7.79                               | 10.23                               | 9.45                      | 9.22                      |
| 10               | 7.79                                             | 8.57                                 | 8.80                               | 8.80                               | 8.93                                | 8.70                      | 8.54                      |
| 11               | 0                                                | 0.43                                 | 0.45                               | 0.46                               | 0.80                                | 0.45                      | 0.56                      |
| 12               | 0.29                                             | 0.00                                 | 0.00                               | 0.00                               | 0.00                                | 0.00                      | 0.00                      |
| 13               | 3.66                                             | 5.09                                 | 4.27                               | 4.02                               | 5.74                                | 4.61                      | 4.34                      |
| 14               | 4.68                                             | 5.61                                 | 4.97                               | 4.78                               | 6.31                                | 5.56                      | 5.36                      |
| 15               | 2.19                                             | 2.84                                 | 2.85                               | 2.84                               | 2.33                                | 2.33                      | 2.33                      |
| 16               | 3.55                                             | 4.09                                 | 3.87                               | 3.79                               | 4.93                                | 4.67                      | 4.59                      |
| 17               | 3.42                                             | 3.17                                 | 3.15                               | 3.15                               | 4.21                                | 3.94                      | 3.98                      |
| 18               | 1.91                                             | 3.29                                 | 2.61                               | 2.42                               | 3.75                                | 2.92                      | 2.70                      |
| 19               | 3.82                                             | 4.71                                 | 4.16                               | 3.97                               | 5.66                                | 4.95                      | 4.73                      |
| 20               | 1.76                                             | 3.13                                 | 2.64                               | 2.46                               | 3.62                                | 3.24                      | 3.06                      |
| 22               | 2.92                                             | 6.85                                 | 0.89                               | 6.84                               | 7.54                                | 4.38                      | 7.31                      |
| 25               | 2.50                                             | 4.09                                 | 3.58                               | 3.43                               | 4.40                                | 3.84                      | 3.76                      |
| 26               | 0.67                                             | 2.35                                 | 1.99                               | 1.89                               | 2.39                                | 2.10                      | 2.10                      |

<sup>a</sup>Reference 30

**Table S7. Values of  $\phi$  and  $\psi$  for the Alanine Tetrapeptides Calculated at the  $\omega$ B97X-D/6-311++g(p,d) Level of Theory**

| Conformer Number | $\omega$ B97X-D/6-311++g(p,d) Optimized Geometry |             |             |             |             |             |
|------------------|--------------------------------------------------|-------------|-------------|-------------|-------------|-------------|
|                  | Ala1 $\phi$                                      | Ala1 $\psi$ | Ala2 $\phi$ | Ala2 $\psi$ | Ala3 $\phi$ | Ala3 $\psi$ |
| 1                | 201.8                                            | 167.4       | 203.2       | 169.4       | 204.1       | 165.2       |
| 2                | 200.9                                            | 164.9       | 201.8       | 163.8       | 277.3       | 78.5        |
| 3                | 280.4                                            | 88.6        | 74.4        | 303.4       | 284.2       | 82.8        |
| 4                | 201.1                                            | 162.5       | 276.9       | 83.6        | 201.2       | 154.6       |
| 5                | 202.3                                            | 170.8       | 280.0       | 348.6       | 205.3       | 166.5       |
| 6                | 272.4                                            | 62.6        | 56.0        | 23.2        | 181.7       | 148.5       |
| 7                | 53.9                                             | 204.9       | 270.8       | 65.4        | 194.7       | 299.3       |
| 8                | 71.0                                             | 288.9       | 304.8       | 132.6       | 61.8        | 23.6        |
| 9                | 74.2                                             | 303.3       | 74.7        | 304.1       | 74.3        | 302.2       |
| 10               | 68.4                                             | 12.9        | 48.3        | 40.3        | 71.2        | 288.9       |
| 11               | 63.6                                             | 255.8       | 300.1       | 326.1       | 278.5       | 76.5        |
| 12               | 62.8                                             | 242.7       | 296.1       | 339.7       | 254.1       | 23.0        |
| 13               | 201.2                                            | 158.1       | 276.6       | 69.6        | 273.5       | 71.6        |
| 14               | 199.3                                            | 162.1       | 293.1       | 339.7       | 251.4       | 16.2        |
| 15               | 292.9                                            | 116.1       | 54.7        | 37.9        | 85.9        | 345.7       |
| 16               | 291.7                                            | 113.9       | 74.5        | 311.9       | 269.1       | 357.6       |
| 17               | 274.2                                            | 69.5        | 67.2        | 291.7       | 286.2       | 121.5       |
| 18               | 276.2                                            | 70.9        | 274.7       | 65.9        | 274.4       | 71.6        |
| 19               | 276.9                                            | 70.6        | 274.7       | 71.6        | 71.6        | 303.7       |
| 20               | 277.5                                            | 73.6        | 290.3       | 339.5       | 261.2       | 10.5        |
| 21               | 272.2                                            | 67.0        | 110.0       | 294.8       | 294.8       | 111.7       |
| 22               | 63.4                                             | 31.5        | 72.1        | 304.6       | 240.5       | 11.1        |
| 23               |                                                  |             |             |             |             |             |
| 24               | 289.2                                            | 336.0       | 275.9       | 67.5        | 63.0        | 32.8        |
| 25               | 286.8                                            | 350.4       | 286.0       | 344.7       | 276.0       | 70.3        |
| 26               | 291.7                                            | 338.8       | 294.4       | 346.0       | 262.2       | 6.4         |
| 27               | 292.4                                            | 334.6       | 240.6       | 35.4        | 69.5        | 283.8       |

**Table S8. Values of  $\phi$  and  $\psi$  for the Alanine Tetrapeptides Calculated at the M06-2X/6-31+g(d) Level of Theory**

| Conformer Number | M06-2X/6-31+g(d) Optimized Geometry |             |             |             |             |             |
|------------------|-------------------------------------|-------------|-------------|-------------|-------------|-------------|
|                  | Ala1 $\phi$                         | Ala1 $\psi$ | Ala2 $\phi$ | Ala2 $\psi$ | Ala3 $\phi$ | Ala3 $\psi$ |
| 1                | 197.8                               | 168.3       | 199.0       | 167.6       | 198.0       | 166.5       |
| 2                | 198.4                               | 166.5       | 198.6       | 160.9       | 277.0       | 73.0        |
| 3                | 279.2                               | 86.9        | 75.7        | 303.3       | 285.0       | 84.5        |
| 4                | 198.3                               | 160.1       | 276.0       | 76.5        | 196.9       | 156.9       |
| 5                | 198.6                               | 168.1       | 280.2       | 349.1       | 200.7       | 168.7       |
| 6                | 272.7                               | 64.0        | 53.2        | 26.9        | 180.4       | 148.9       |
| 7                | 51.4                                | 204.3       | 271.8       | 65.0        | 196.5       | 301.8       |
| 8                | 70.7                                | 284.6       | 308.9       | 137.9       | 60.7        | 22.7        |
| 9                | 75.6                                | 304.1       | 76.0        | 306.3       | 75.1        | 308.5       |
| 10               | 64.5                                | 22.7        | 54.5        | 31.5        | 73.2        | 303.2       |
| 11               | 60.1                                | 245.9       | 305.1       | 326.3       | 281.4       | 78.3        |
| 12               | 61.5                                | 240.0       | 297.3       | 337.8       | 255.9       | 22.4        |
| 13               | 197.4                               | 159.1       | 276.3       | 68.4        | 274.1       | 67.9        |
| 14               | 197.0                               | 162.2       | 293.2       | 339.7       | 264.4       | 9.0         |
| 15               | 294.7                               | 118.2       | 53.6        | 39.8        | 84.8        | 347.4       |
| 16               | 292.9                               | 109.3       | 75.0        | 313.0       | 273.3       | 355.1       |
| 17               | 276.4                               | 69.7        | 65.3        | 282.7       | 295.3       | 127.6       |
| 18               | 276.5                               | 71.9        | 274.7       | 66.3        | 274.6       | 68.4        |
| 19               | 276.7                               | 71.1        | 274.4       | 71.4        | 73.3        | 304.7       |
| 20               | 277.1                               | 73.8        | 291.6       | 338.3       | 265.4       | 8.4         |
| 21               | 217.6                               | 40.6        | 71.3        | 285.9       | 308.2       | 138.4       |
| 22               | 63.2                                | 31.5        | 73.5        | 307.2       | 221.2       | 23.4        |
| 23               | 61.8                                | 32.4        | 73.6        | 302.8       | 200.2       | 358.0       |
| 24               | 290.2                               | 337.5       | 277.0       | 110.2       | 61.8        | 32.9        |
| 25               | 289.4                               | 346.1       | 285.8       | 348.6       | 276.5       | 68.1        |
| 26               | 292.8                               | 337.4       | 295.1       | 345.3       | 272.9       | 359.3       |
| 27               | 291.8                               | 338.2       | 263.7       | 9.3         | 74.9        | 301.6       |



**Table S9. Relative Conformer Energies (in kcal/mol) for the Blocked Proline Dipeptide Calculated with Various *ab initio* Methods and Molecular Mechanics Force Fields**

|      | CCSD(T)/CBS <sup>a</sup> | OPLS-AA | OPLS-AA/L | 2000 K |
|------|--------------------------|---------|-----------|--------|
| tCd  | 0.00                     | 0.00    | 0.00      | 0.00   |
| tCu  | 1.44                     | 3.81    | 3.84      | 1.70   |
| cAd  | 3.27                     | 3.03    | 1.61      | 2.90   |
| cAu  | 4.29                     | 4.82    | 4.52      | 4.29   |
| tAu  | 4.95                     |         |           |        |
| cFd  | 6.00                     | 3.35    | 3.21      | 6.40   |
| cFu  | 6.50                     | 4.85    | 5.10      | 6.31   |
| RMSD |                          | 1.58    | 1.67      | 0.26   |

<sup>a</sup>Reference 16

**Table S10. Summary of the Force Field Parameters Developed and Tested in this Work for Proline and their Average per Scan Boltzmann-Weighted Errors Compared to the B2PLYP-D3BJ/aug-cc-pVTZ// $\omega$ B97X-D/6-311++G(d,p) Energies for the Two Proline  $\psi$  Scans. Parameters Noted with a \* are those Selected for the OPLS-AA/M Force Field.**

|             |              | Parameters <sup>a</sup> |        |         | Atoms                                | Boltzmann Weighted Error <sup>a</sup> |        |        |            |
|-------------|--------------|-------------------------|--------|---------|--------------------------------------|---------------------------------------|--------|--------|------------|
|             |              | V1                      | V2     | V3      |                                      | 500 K                                 | 1000 K | 2000 K | Unweighted |
| OPLS-AA     | $\psi$       | 1.816                   | 1.222  | 1.581   | N-C $\alpha$ -C-N                    | 0.266                                 | 0.653  | 1.287  | 3.331      |
|             | $\psi'$      | 1.173                   | 0.189  | -1.200  | N-C-C $\alpha$ -C $\beta$            |                                       |        |        |            |
|             | $\chi_1$     | 0.845                   | -0.962 | 0.713   | N-C $\alpha$ -C $\beta$ -C $\gamma$  |                                       |        |        |            |
|             | $\chi_1'$    | -1.697                  | -0.456 | 0.585   | C-C $\alpha$ -C $\beta$ -C $\gamma$  |                                       |        |        |            |
|             | $\varphi'''$ | -1.737                  | 1.251  | -3.501  | C $\delta$ -N-C $\alpha$ -C          |                                       |        |        |            |
|             | $\chi_5$     | 4.753                   | -0.734 | 0.00    | C $\delta$ -N-C $\alpha$ -C $\beta$  |                                       |        |        |            |
|             | $\chi_4$     | 2.859                   | 2.058  | -11.266 | C $\gamma$ -C $\delta$ -N-C $\alpha$ |                                       |        |        |            |
|             |              |                         |        |         |                                      |                                       |        |        |            |
| OPLS-AA/L   | $\psi$       | 0.743                   | 2.508  | -0.805  | N-C $\alpha$ -C-N                    | 0.199                                 | 0.498  | 0.964  | 2.550      |
|             | $\psi'$      | 1.865                   | 0.089  | 0.351   | N-C-C $\alpha$ -C $\beta$            |                                       |        |        |            |
|             | $\chi_1$     | 0.845                   | -0.962 | 0.713   | N-C $\alpha$ -C $\beta$ -C $\gamma$  |                                       |        |        |            |
|             | $\chi_1'$    | -1.697                  | -0.456 | 0.585   | C-C $\alpha$ -C $\beta$ -C $\gamma$  |                                       |        |        |            |
|             | $\varphi'''$ | -1.737                  | 1.251  | -3.501  | C $\delta$ -N-C $\alpha$ -C          |                                       |        |        |            |
|             | $\chi_5$     | 4.753                   | -0.734 | 0.00    | C $\delta$ -N-C $\alpha$ -C $\beta$  |                                       |        |        |            |
|             | $\chi_4$     | 2.859                   | 2.058  | -11.266 | C $\gamma$ -C $\delta$ -N-C $\alpha$ |                                       |        |        |            |
|             |              |                         |        |         |                                      |                                       |        |        |            |
| *2000 K Pro | $\psi$       | -0.940                  | 2.755  | -2.670  | N-C $\alpha$ -C-N                    | 0.170                                 | 0.331  | 0.568  | 1.116      |
|             | $\psi'$      | 5.029                   | 0.719  | 2.240   | N-C-C $\alpha$ -C $\beta$            |                                       |        |        |            |
|             | $\chi_1$     | 1.572                   | 0.159  | 0.200   | N-C $\alpha$ -C $\beta$ -C $\gamma$  |                                       |        |        |            |
|             | $\chi_1'$    | -1.751                  | 1.606  | 0.000   | C-C $\alpha$ -C $\beta$ -C $\gamma$  |                                       |        |        |            |
|             | $\varphi'''$ | -1.737                  | 1.251  | -3.501  | C $\delta$ -N-C $\alpha$ -C          |                                       |        |        |            |
|             | $\chi_5$     | 4.753                   | -0.734 | 0.00    | C $\delta$ -N-C $\alpha$ -C $\beta$  |                                       |        |        |            |
|             | $\chi_4$     | 2.859                   | 2.058  | -11.266 | C $\gamma$ -C $\delta$ -N-C $\alpha$ |                                       |        |        |            |
|             |              |                         |        |         |                                      |                                       |        |        |            |

<sup>a</sup>Both the parameters and the RMSD values have units of kcal/mol

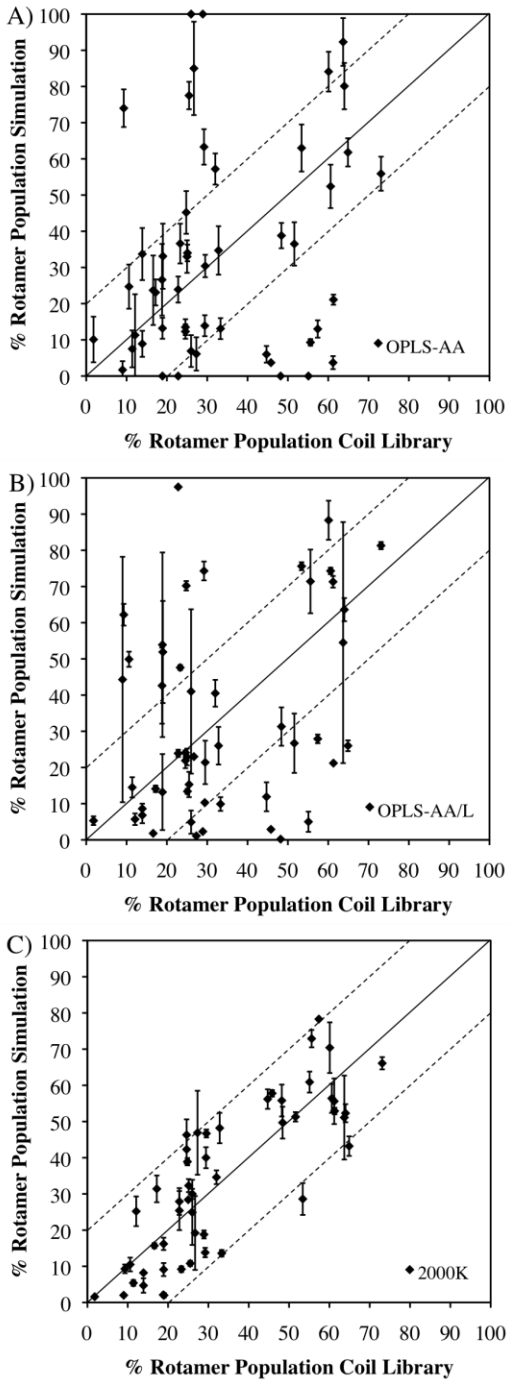

**Figure S12.** The populations of each rotamer as a percentage from molecular dynamics simulations of blocked dipeptides versus the average populations from a coil library. Results are given for the OPLS-AA (A), OPLS-AA/L (B), and OPLS-AA/M (C). Dashed lines delineate the

region of populations that fall within  $\pm 20\%$  of the experimental result. Error bars from simulation represent the standard deviation in the populations from triplicate 200 ns simulations.

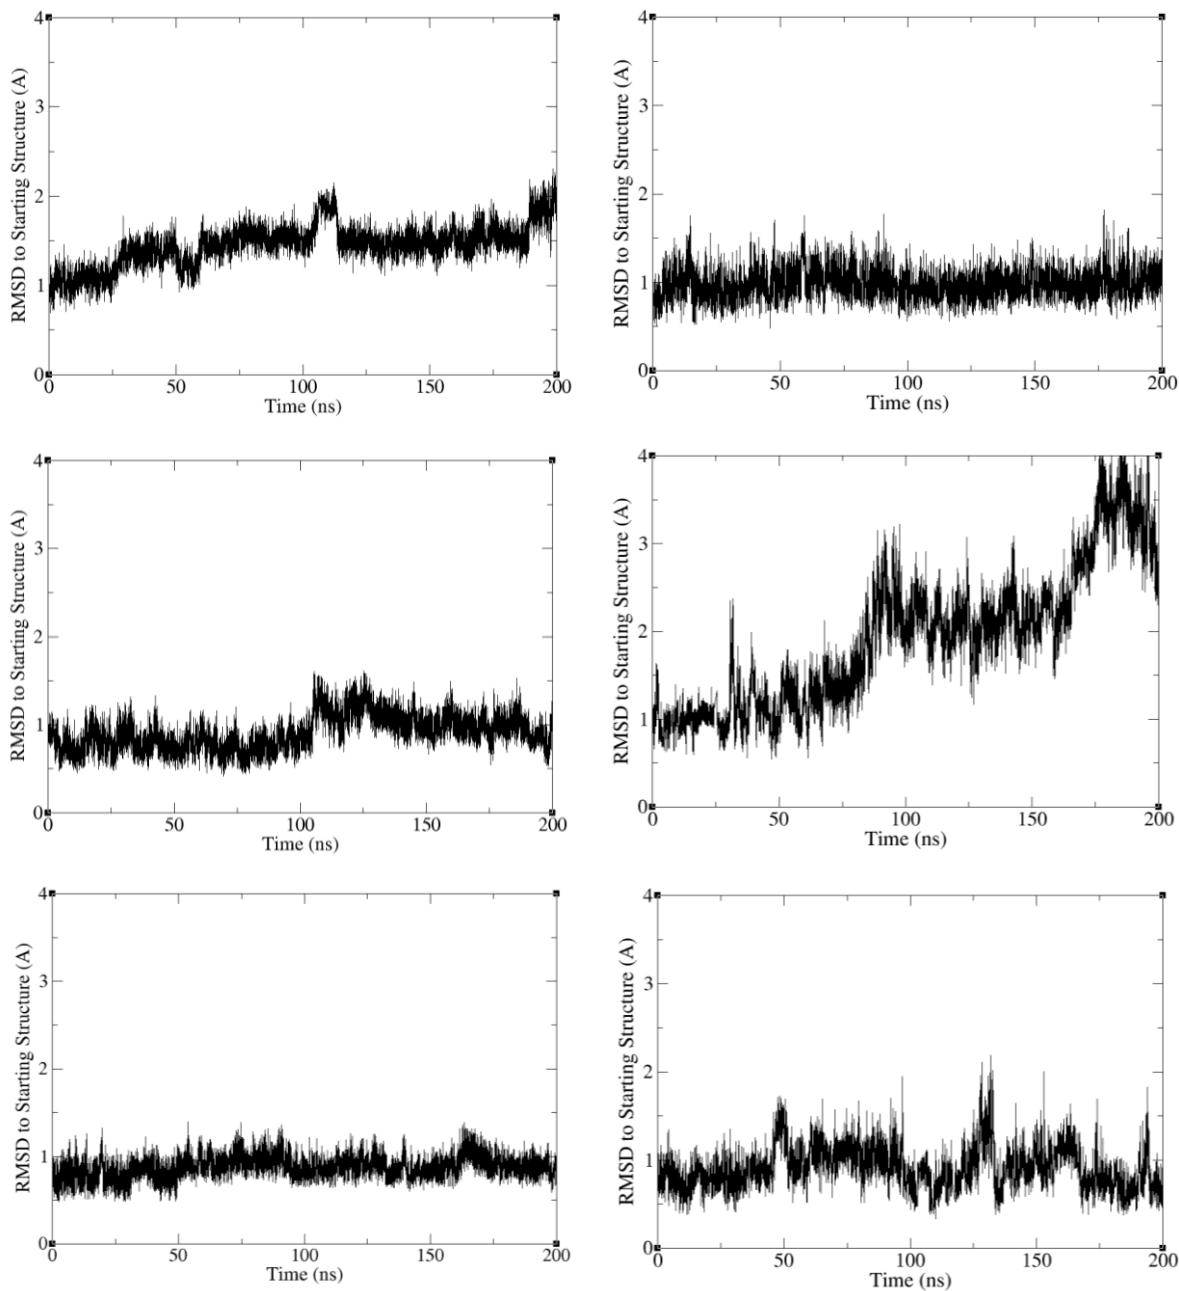

**Figure SI3.** The RMSD between the coordinates of the backbone atoms in the MD simulations compared to the starting experimental structure over the course of the trajectory for the first run.

The first, second, and third rows correspond to trajectories with OPLS-AA, OPLS-AA/L, and OPLS-AA/M, while the first and second columns correspond to ubiquitin residues 1-72 and GB3 respectively.
